# Supplementary material for: Technical note: A fast and reproducible autosampler for direct vapor equilibration isotope measurements
Source: Copernicus journal article supplement (doi:10.5194/hess-29-525-2025), 2025-01-24
Supplement: Supplementary file 1 [file hess-29-525-2025-supplement.zip]

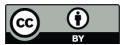

*Supplement of*

## **Technical note: A fast and reproducible autosampler for direct vapor equilibration isotope measurements**

**Jonas Pyschik et al.**

*Correspondence to:* Jonas Pyschik ([jonas.pyschik@hydrology.uni-freiburg.de](mailto:jonas.pyschik@hydrology.uni-freiburg.de))

- [hess-29-525-2025-supplement-title-page.pdf](#)
- Supplements
  - [README.txt](#)
  - [VapAuSa\\_Benchmark\\_Data.csv](#)

The copyright of individual parts of the supplement might differ from the article licence.
